# Supplementary material for: Impact of App-Delivered Mindfulness Meditation on Functional Connectivity, Mental Health, and Sleep Disturbances Among Physician Assistant Students: Randomized, Wait-list Controlled Pilot Study
Source: PubMed Central journal article supplement (PMC8564666; doi:10.2196/24208), 2021-10-19
Supplement: formative_v5i10e24208_app2.pdf [file formative_v5i10e24208_app2.pdf]

## Clusters indicated by two-way ANOVA on PCs 1 and 2

**Figure SF1.** Two principal components were extracted for each voxel from subjects' within-visit, reduced-dimensionality dataset, then subjected to two-way ANOVA [*group* × *visit*] to select voxels which modulated with either condition (multivariate pattern analysis, MVPA). 87 voxel clusters, shown here, exhibited statistically-significant *group* × *visit* differences at  $p_{FDR} \leq .05$ . Of these, 16 clusters were excluded due to their localization in white matter. The 71 extant clusters were combined with atlas-based regions of interest (ROIs) corresponding to the default mode, sensorimotor, visual, salience, dorsal attention, frontoparietal, language, and cerebellar intrinsic connectivity networks for a total 102 ROIs. The corresponding ROI-ROI connectivity matrix was leveraged for further statistical analysis.

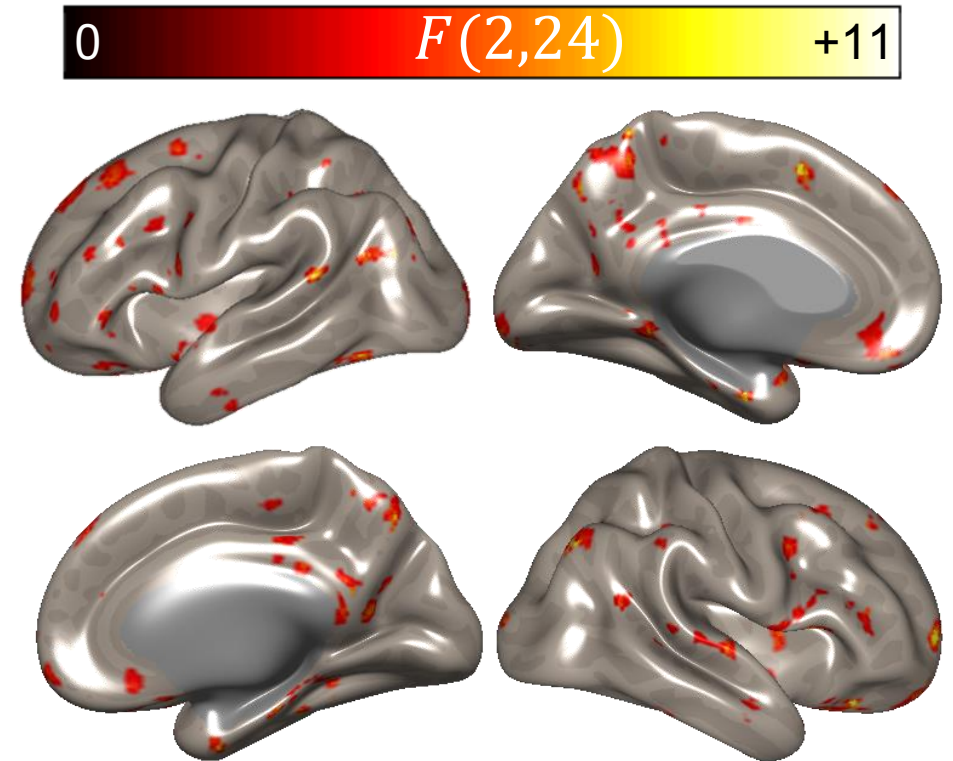

# SUPPLEMENTARY MATERIAL

## ROI-ROI connectivity matrices by group and visit

**Figure SF2.** Average ROI-ROI connectivity matrices by *group* (wait list or mindfulness) and *visit* (baseline or +8 weeks). A “delta matrix,”  $\Delta\text{conn}$ , was also computed for each *group* as  $\Delta\text{conn} = \text{conn}_{8\text{wks}} - \text{conn}_{\text{baseline}}$ . Color bars below figure represent Pearson product-moment correlations between ROI pairs.

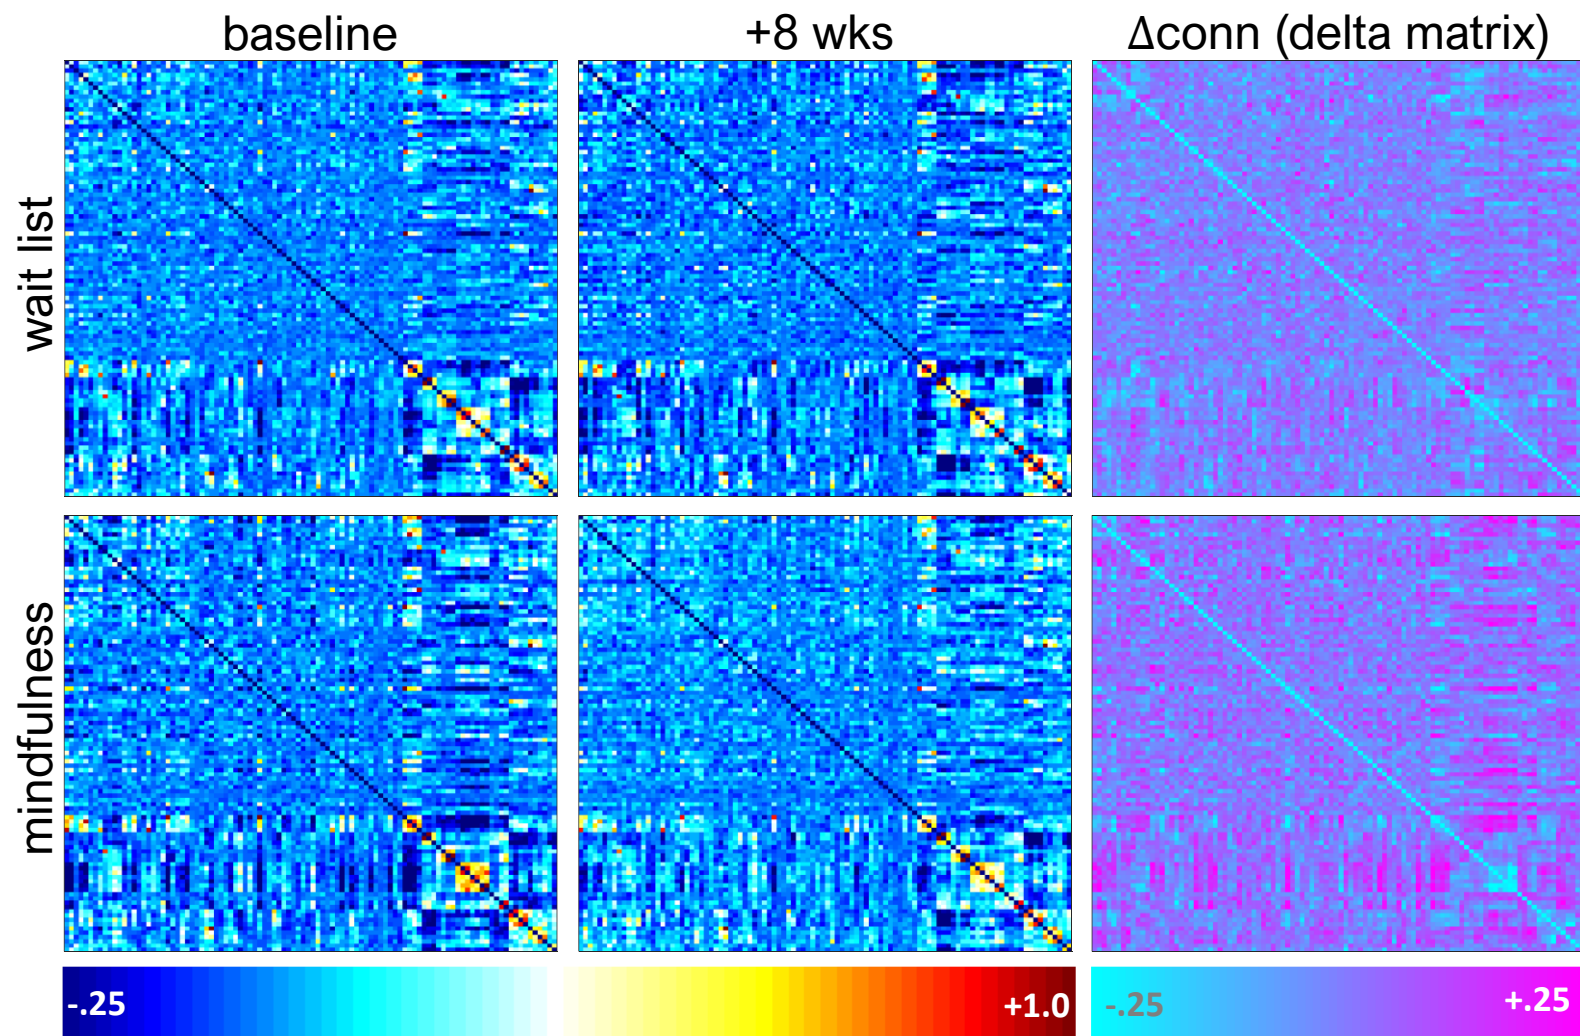

# SUPPLEMENTARY MATERIAL

**Table ST1.** Results of linear regression on delta matrix with practice time as the predictor.

| ID1                 | ID2                  | ROI1                        | ROI2                     | F       | MSE    | model p | post hoc | mean difference | p      |
|---------------------|----------------------|-----------------------------|--------------------------|---------|--------|---------|----------|-----------------|--------|
| op1_Rro             | t5_Lba22c            | R rolandic operculum/r. BA6 | L sup. temp. visual area | 22.3719 | 0.0092 | 0.0052  |          | (intercept)     | 0.0052 |
| anterior cerebellum | posterior cerebellum | anterior cerebellum         | posterior cerebellum     | 9.5701  | 0.0068 | 0.027   |          | (intercept)     | 0.0068 |

**Table ST2.** Results of one-way ANOVA on delta matrix with practice time **bin** as the predictor. Post hoc analysis by two-tailed t-test. p-values FDR-corrected by Benjamini-Hochberg procedure. Two-way ANOVA on group x practice time bin was not significant.

| ID1         | ID2            | ROI1                                 | ROI2                                | F      | MSE    | model p | post hoc              | mean difference | p      |
|-------------|----------------|--------------------------------------|-------------------------------------|--------|--------|---------|-----------------------|-----------------|--------|
| cing1_Rpcc  | f1_Lba9        | <b>R post. cingulate ctx.</b>        | <b>L sup. frontal g./BA9</b>        | 3.9467 | 0.0064 | 0.0405  | practice Q2 < Q1      | -0.2874         | 0.0354 |
| pl2_Lba7m   | orb1_Rba11     | <b>L med. BA7/med. BA5</b>           | <b>R lat. BA11/area Fo3</b>         | 3.9042 | 0.0316 | 0.0416  |                       | <i>n.s.</i>     |        |
| f3_Rba8v    | pl3_Lba7m5ml   | <b>R ventral BA8/IFJ</b>             | <b>L med. BA7/med. lat. BA5</b>     | 5.6844 | 0.0213 | 0.0145  | practice Q2 < control | 0.5025          | 0.0132 |
|             |                |                                      |                                     |        |        |         | practice Q2 < Q4      | 0.5349          | 0.0324 |
|             |                |                                      |                                     |        |        |         | practice Q2 < Q1      | -0.5702         | 0.0228 |
| t1_Lffc     | orb2_Lba10r14m | <b>L fusiform face complex</b>       | <b>L r. BA10/med. BA14</b>          | 8.078  | 0.0124 | 0.0048  | practice Q4 > Q3      | -0.434          | 0.0061 |
|             |                |                                      |                                     |        |        |         | practice Q2 > Q3      | -0.3428         | 0.0251 |
| f9_Lba44v   | orb4_L47l      | <b>L ventral BA44/IFG tri.</b>       | <b>L lat. BA47/IFG orb.</b>         | 6.129  | 0.0153 | 0.0116  | practice Q1 > Q3      | -0.5765         | 0.0264 |
|             |                |                                      |                                     |        |        |         | practice Q2 > Q3      | -0.7354         | 0.0061 |
|             |                |                                      |                                     |        |        |         | practice Q3 < control | -0.5637         | 0.0137 |
| op1_Rro     | t5_Lba22c      | <b>R rolandic operculum/r. BA6</b>   | <b>L sup. temp. vis. area/BA22</b>  | 5.6448 | 0.0098 | 0.0149  | practice Q4 < control | 0.3135          | 0.0215 |
|             |                |                                      |                                     |        |        |         | practice Q4 < Q2      | -0.3368         | 0.0474 |
|             |                |                                      |                                     |        |        |         | practice Q4 < Q1      | -0.4284         | 0.0126 |
| o3_Rv2v3d   | t12_Rba38l     | <b>R sup. occip. g./visual V2-V3</b> | <b>R dorsal area TG/BA 38</b>       | 4.4711 | 0.0079 | 0.029   | practice Q3 > control | 0.3558          | 0.029  |
| f11_Rba6ba8 | f12_Lba6ba8    | <b>R sup. frontal g./sup. BA6-8</b>  | <b>L mid. frontal g./inf. BA6-8</b> | 4.3477 | 0.0115 | 0.0313  | practice Q3 > control | 0.3831          | 0.0516 |
|             |                |                                      |                                     |        |        |         | practice Q2 < Q3      | 0.4368          | 0.0528 |
| f12_Lba6ba8 | orb8_Rofc      | <b>L mid. frontal g./inf. BA6-8</b>  | <b>R OFC/area Fo2</b>               | 4.0289 | 0.0023 | 0.0384  | practice Q3 < control | -0.1857         | 0.0356 |
|             |                |                                      |                                     |        |        |         | practice Q3 < Q1      | -0.2011         | 0.0474 |

# SUPPLEMENTARY MATERIAL

**Figure SF3.** Results of linear regressions with connectivity as the dependent variable and practice time (in minutes) as the predictor. Connections assessed included orbitofrontal MVPA ROIs *orb1* (Brodmann area 11) and *orb9* (Brodmann 14) and atlas-defined ROIs occipitopolar visual cortex, right lateral visual cortex, and left lateral sensorimotor cortex.

**NOTE: MINDFULNESS group only**

|                        | <u>vs</u>                    | <u>rho</u> | <u>p(FDR)</u> |
|------------------------|------------------------------|------------|---------------|
| orb1_Rba11             | orb9_Rba14m                  | 0.991      | 0.0397        |
| occipitopolar visual   | R inferior parietal s. (DAN) | 0.991      | 0.0397        |
| R lateral visual       | R inferior parietal s. (DAN) | 0.991      | 0.0397        |
| L lateral sensorimotor | orb9_Rba14m                  | -0.991     | 0.0397        |

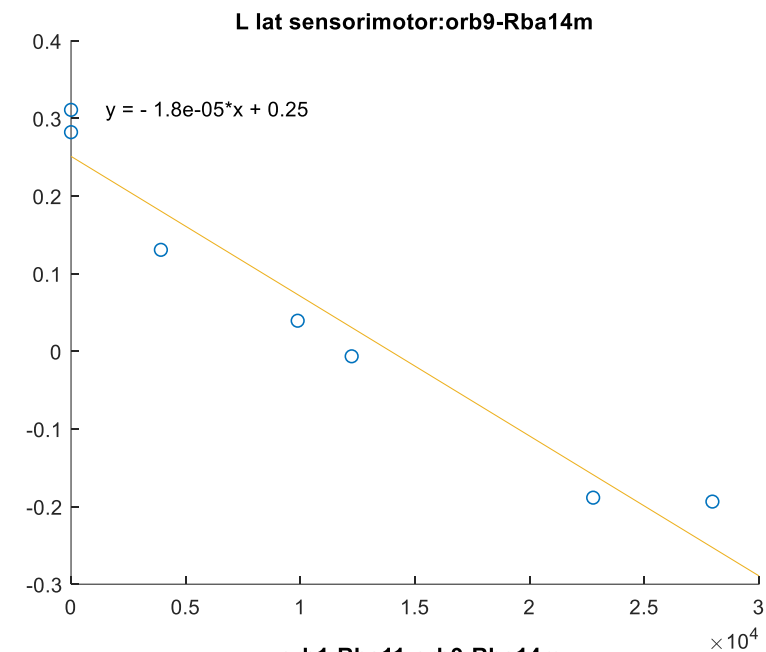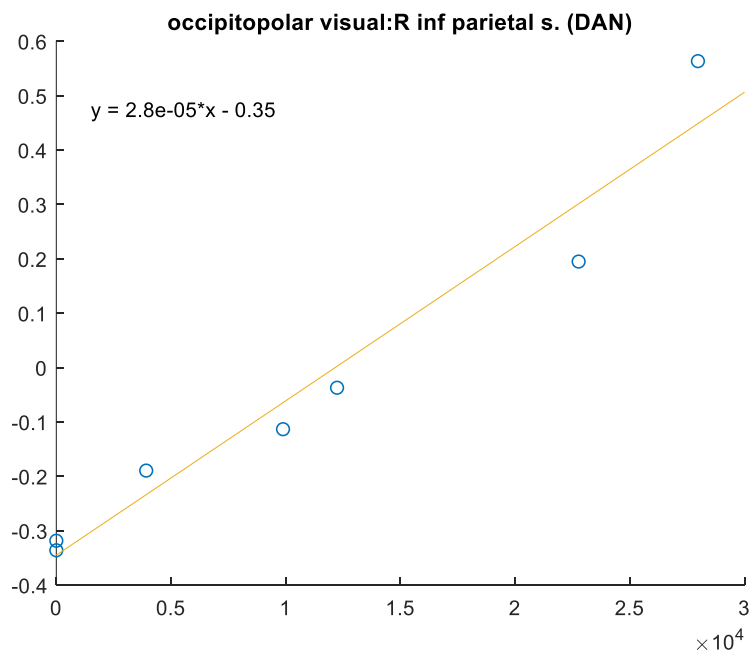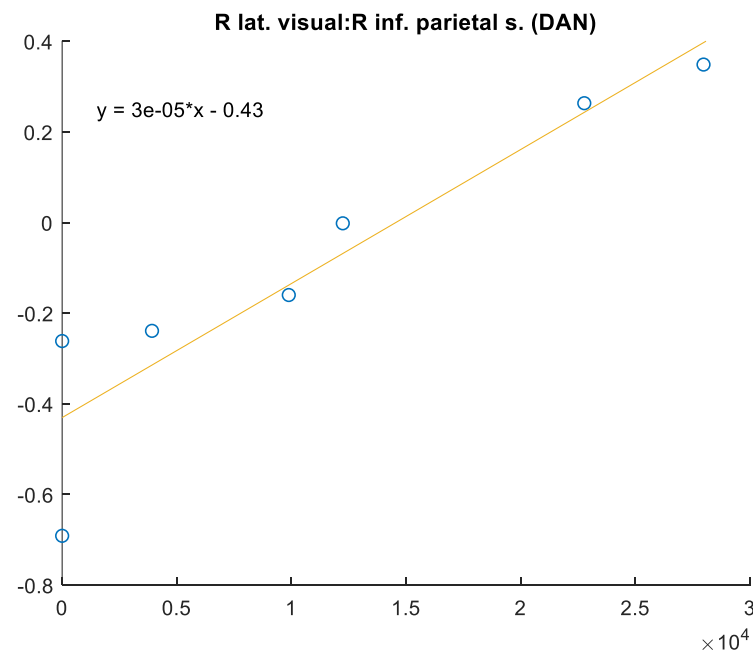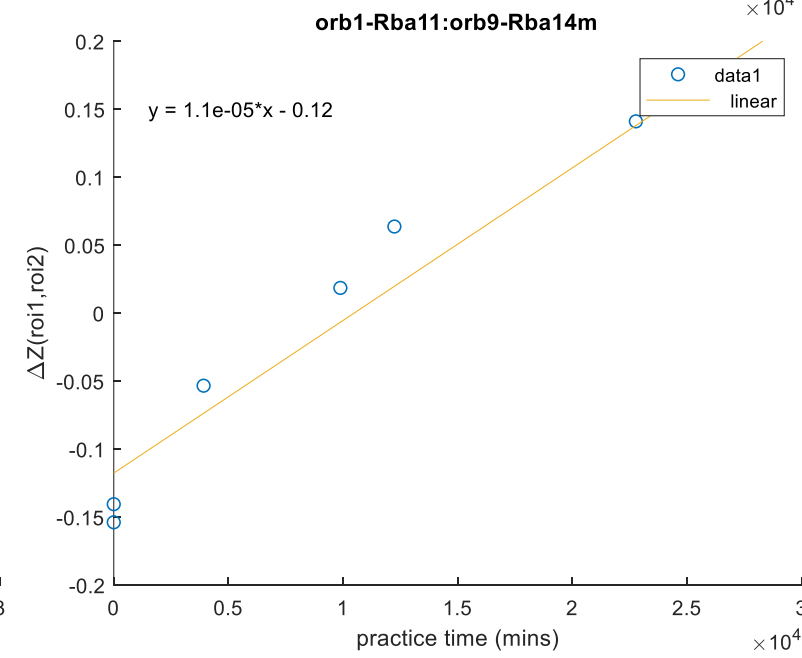

## Predicting HAS\_IMPAIRMENT=1 → HAS\_IMPAIRMENT=0

**Figure S4.** Sleep impairment by subject and visit (visit 1, baseline; visit 2, +8 weeks) based on PROMIS scores at each visit. Three wait list subjects and three mindfulness subjects were classified as sleep-impaired at visit 1. All three mindfulness subjects (including one non-compliant subject) were classified as non-impaired at +8 weeks, whereas all three control subjects remained impaired.

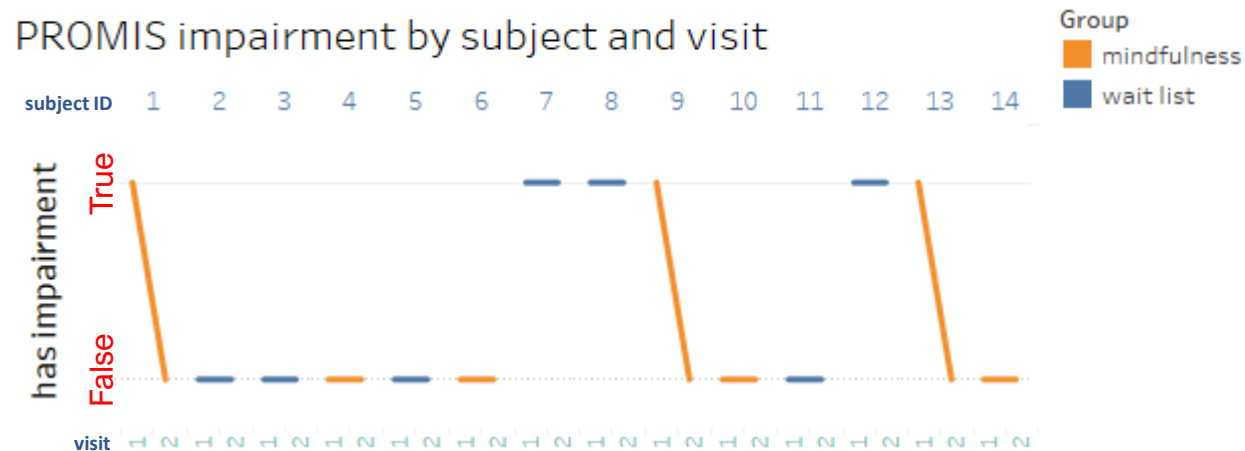

**Table ST3.** Classifiers used for prediction of change in IMPAIRMENT, with hyperparameters.

|                              | <b>scikit-learn class</b>                          | <b>hyperparameters tuned</b>                                                                                                                                                                 | <b>train/test split</b> | <b>crossvalidation</b> | <b>tuning iterations</b> |
|------------------------------|----------------------------------------------------|----------------------------------------------------------------------------------------------------------------------------------------------------------------------------------------------|-------------------------|------------------------|--------------------------|
| <b>support vector</b>        | svm.SVC()                                          | C; gamma; kernel (linear, polynomial, radial basis function, sigmoid); degree for polynomial (2-10); class weight = balanced or none; decision function = one versus one or one versus rest. | 30:70                   | 5-fold                 | 5000                     |
| <b>gradient boosting</b>     | ensemble.GradientBoostingClassifier()              | learning rate; min samples to split (10-90%); max depth (1-100); number of estimators (10-1000)                                                                                              | 30:70                   | 5-fold                 | 5000                     |
| <b>random forest</b>         | ensemble.RandomForestClassifier()                  | min samples to split (10-90%); max depth (1-100); number of estimators (10-1500)                                                                                                             | 30:70                   | 5-fold                 | 5000                     |
| <b>multilayer perceptron</b> | neural_network.MLPClassifier()                     | hidden layer sizes (3-9 layers, 4-169 nodes per layer); activation function (logistic, tanh, ReLU); alpha (1e-5 to 5e-5); early stopping (true/false); solver (lbfgs, sgd, adam)             | 30:70                   | 5-fold                 | 5000                     |
| <b>gaussian naïve bayes</b>  | naïve_bayes.GaussianNB()                           | smoothing parameter                                                                                                                                                                          | 30:70                   | 5-fold                 | 5000                     |
| <b>linear discriminant</b>   | discriminant_analysis.LinearDiscriminantAnalysis() | solver (svd, lsqr, eigen); shrinkage (none or auto)                                                                                                                                          | 30:70                   | 5-fold                 | 5000                     |

# SUPPLEMENTARY MATERIAL

**Table ST4.** Results of change in IMPAIRMENT predictions using entire connectome (top: "no PCA decomp.") and using dimensionally-reduced connectome data (bottom: "with PCA decomp.").

|                  | best parameters       | accuracy                                                                                                        | sensitivity  | specificity | precision | FPR  | FNR       |
|------------------|-----------------------|-----------------------------------------------------------------------------------------------------------------|--------------|-------------|-----------|------|-----------|
| no PCA decomp.   | support vector        | C=20.5316, balanced, OVR, degree=3, gamma=.0028, sigmoid kernel                                                 | 77.14±7.82%  | 1.00        | 0.00      | 0.77 | 1.00 0.00 |
|                  | gradient boosting     | 380 estimators, 0.1 min samples split, max depth=93, learning rate=.5                                           | 74.28±6.39%  | 0.97        | 0.00      | 0.77 | 1.00 0.03 |
|                  | random forest         | 725 estimators, 0.70 min samples split, max depth=87                                                            | 77.14±7.82%  | 1.00        | 0.00      | 0.77 | 1.00 0.00 |
|                  | multilayer perceptron | solver=sgd, hidden layer sizes=(169,169,50), alpha=.0041, logistic activation, no early stopping                | 77.14±7.82%  | 1.00        | 0.00      | 0.77 | 1.00 0.00 |
|                  | gaussian naïve bayes  | smoothing=1.0239e-10                                                                                            | 77.14±7.82%  | 1.00        | 0.00      | 0.77 | 1.00 0.00 |
|                  | linear discriminant   | lsqr solver, auto shrinkage                                                                                     | 77.14±7.82%  | 1.00        | 0.00      | 0.77 | 1.00 0.00 |
| with PCA decomp. | support vector        | C=43.4765, balanced, OVR, degree=2, gamma=.0489, poly kernel                                                    | 80.00±7.82%  | 0.20        | 0.93      | 0.33 | 0.07 0.80 |
|                  | gradient boosting     | 300 estimators, 0.5 samples split, max depth=38, learning rate=.1                                               | 60.71±7.14%  | 0.00        | 0.87      | 0.00 | 0.13 1.00 |
|                  | random forest         | 705 estimators, 0.55 samples split, max depth=22                                                                | 82.85±6.39%  | 0.00        | 1.00      | 0.00 | 0.00 1.00 |
|                  | multilayer perceptron | solver=lbgfs, hidden layer sizes=(169, 128, 64, 32, 16, 4), alpha=.0072, logistic activation, no early stopping | 80.00±12.78% | 0.00        | 0.83      | 0.00 | 0.17 1.00 |
|                  | gaussian naïve bayes  | smoothing=2.1142e-10                                                                                            | 82.85±6.39%  | 0.00        | 1.00      | 0.00 | 0.00 1.00 |
|                  | linear discriminant   | lsqr solver, auto shrinkage                                                                                     | 60.71±7.14%  | 0.25        | 0.83      | 0.11 | 0.17 1.00 |
